# Supplementary material
Source: HighWire-hosted journal article supplement (http://rc.rcjournal.com/highwire/filestream/21400/field_highwire_adjunct_files/0/8824suppl1.docx)
Supplement: 8824suppl1.docx [file 8824suppl1.docx]

| Table 3 Online supplement |  |  |  |  |  |  |  |  |
| --- | --- | --- | --- | --- | --- | --- | --- | --- |
|  | Technical procedure | | | | p value | | | |
| Percutaneous (n=12) | | Surgical (n=8) | | Percutaneous | Surgical | Percutaneous - Surgical | Percutaneous - Surgical |
| Pre-24hs | Post-24hs | Pre-24hs | Post-24hs | (pre vs post) | (pre vs post) | (pre vs pre) | (post vs post) |
| Tidal volume (ml/Kg PBW) | 7.3 (6.4 - 8.1) | 7.1 (6.2 - 7.8) | 5.1(4.1 - 6.1) | 5.6 (4.6 - 6.6) | 0.64 | 0.46 | <0.01 | 0.03 |
| Respiratory rate (rpm) | 21.9 (19.6 - 24.2) | 22.7 (20.4 - 25.0) | 22.2 (19.6 - 24.9) | 22.0 (19.3 - 24.7) | 0.62 | 0.89 | 0.84 | 0.70 |
| Compliance (ml/cmH2O) | 49.8 (42.1 - 57.6) | 44.8 (37.1 - 52.5) | 45.4 (33.0 - 57.7) | 50.1 (37.7 - 62.4) | 0.35 | 0.57 | 0.52 | 0.41 |
| Resistance (cmH2O/L/s) | 8.2 (5.8 - 10.5) | 7.1 (4.7 - 9.4) | 10.8 (7.7 - 13.8) | 7.0 (4.0 - 10.1) | 0.49 | 0.08 | 0.25 | 0.97 |
| Peak inspiratory flow (L/min) | 42.9 (37.1 - 48.7) | 46.8 (40.5 - 53.1) | 39.8 (32.7 - 46.9) | 45.9 (38.4 - 53.5) | 0.52 | 0.47 | 0.48 | 0.86 |
| End-expiratory flow (L/min) | –3.5 (–5.2 - –1.7) | –2.8 (–4.5 - –1.1) | –2.0 (–3.0 - –1.0) | –2.42 (–3.41 - –1.42) | 0.57 | 0.56 | 0.22 | 0.69 |
| Peak expiratory flow (L/min) | –45.1 (–54.8 - –35.3) | –50.1 (–59.8 - –40.3) | –47.6 (–60.0 - –35.1) | –51.0 (–63.4 - –38.5) | 0.46 | 0.68 | 0.74 | 0.90 |
| total-PEEP (cmH2O) | 6.5 (5.4 - 7.7) | 5.8 (4.7 - 7.0) | 6.3 (5.0 - 7.6) | 6.2 (4.9 - 7.5) | 0.37 | 0.86 | 0.81 | 0.66 |
| Ti/Ttot | 0.36 (0.33 - 0.40) | 0.38 (0.34 - 0.41) | 0.34 (0.31 - 0.37) | 0.31 (0.29 - 0.34) | 0.63 | 0.16 | 0.21 | 0.01 |
| Reactance (cmH2O/L/s) | –10.2 (–11.8 - –8.6) | –10.6 (–12.2 - –9.1) | –12.5 (–16.5 - –8.5) | –10.4 (–14.4 - –6.4) | 0.68 | 0.45 | 0.25 | 0.94 |
| Impedance (cmH2O/L/s) | 13.9 (11.5 - 16.3) | 13.6 (10.8 - 15.5) | 17.2 (12.4 - 21.9) | 13.2 (8.4 - 17.9) | 0.65 | 0.27 | 0.20 | 0.97 |
| Asynchrony Index (%) | 2.8 (1.3 - 6.1) | 3.5 (1.6 - 7.6) | 1.2 (0.5 - 2.7) | 4.9 (2.1 - 11.1) | 0.70 | 0.01 | 0.19 | 0.55 |
| Ineffective expiratory effort (%) | 1.3 (0.5 - 3.3) | 1.7 (0.7 - 4.6) | 0.5 (0.2 - 1.4) | 2.9 (1.0 - 8.0) | 0.64 | 0.01 | 0.28 | 0.43 |
| Double cycling (%) | 0.6 (0.2 - 1.3) | 0.8 (0.3 - 2.0) | 0.5 (0.2 - 1.2) | 1.0 (0.4 - 2.3) | 0.52 | 0.32 | 0.88 | 0.82 |
| Air trapping (%) | 14.1 (7.5 - 2.6) | 11.1 (5.9 - 2.1) | 3.1 (1.2 - 8.1) | 9.9 (3.8 - 2.5) | 0.61 | 0.09 | 0.01 | 0.82 |
| Sedation-Agitation Scale | 3.9 (3.8 - 4.6) | 3.9 (3.4 - 4.5) | 2.8 (2.0 - 3.6) | 2.8 (2.1 - 3.5) | 0.79 | 0.67 | 0.03 | 0.01 |

Patient-ventilator asynchronies and respiratory system mechanics before and after percutaneous and surgical tracheostomy, expressed in median (25th ­– 75th percentiles).
